# Supplementary figures and images for: Insights into the mechanisms of plasma physicochemical characteristics on ultralong-lasting plasma-activated water: the influence of DC power polarity on RONS generation
Source: Royal Society of Chemistry journal article supplement (doi:10.1039/d4cp00384e), 2024-01-01

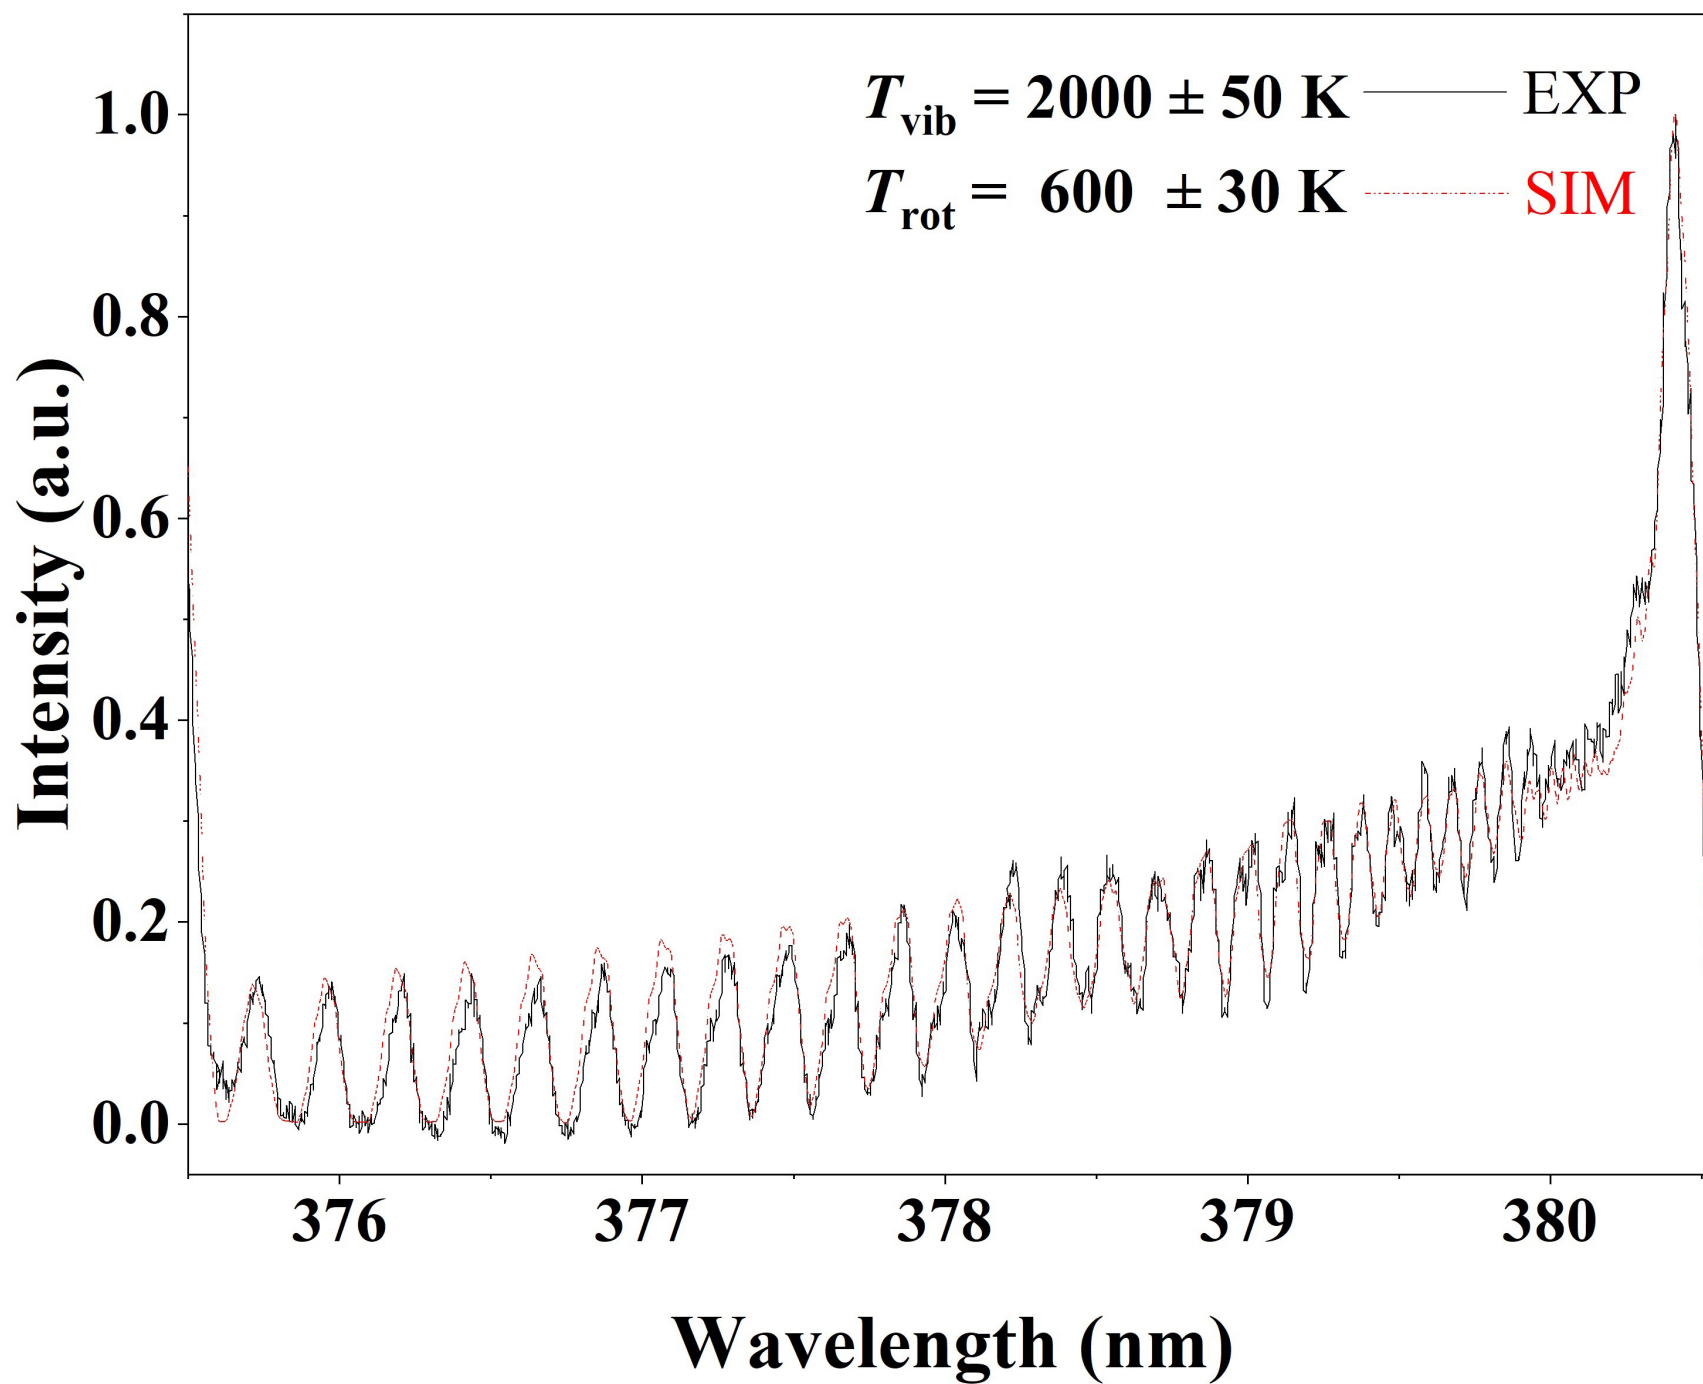

Supplement: d4cp00384e2.pdf [file d4cp00384e2.pdf]

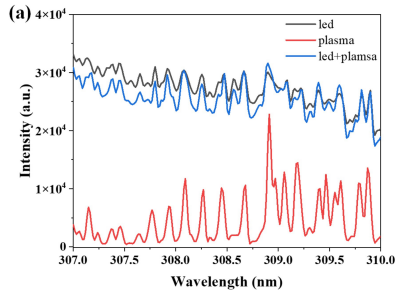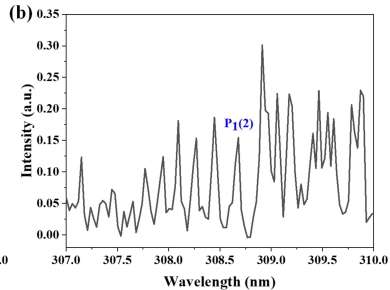

Supplement: d4cp00384e3.pdf [file d4cp00384e3.pdf]
